# Supplementary material for: Interventions to reduce sedentary behaviour in 0–5-year-olds: a systematic review and meta-analysis of randomised controlled trials
Source: PubMed Central journal article supplement — Br J Sports Med. 2016 Oct 6;52(5):314–21. doi: 10.1136/bjsports-2016-096634 (PMC5867408; doi:10.1136/bjsports-2016-096634), 2016-10-06
Supplement: bjsports-2016-096634supp001.pdf [file bjsports-2016-096634supp001.pdf]

Supplement Table 1 Summary of included studies (by intervention setting)

| Author                             | Sample                                                                         | Design, setting & duration                      | Sessions                                                              | Behaviours targeted | Intervention                                                                                                                                                                                                                                                                                 | Control                | SB measure                                                                                      | Results                                                                                                                                                                                                                                                    |
|------------------------------------|--------------------------------------------------------------------------------|-------------------------------------------------|-----------------------------------------------------------------------|---------------------|----------------------------------------------------------------------------------------------------------------------------------------------------------------------------------------------------------------------------------------------------------------------------------------------|------------------------|-------------------------------------------------------------------------------------------------|------------------------------------------------------------------------------------------------------------------------------------------------------------------------------------------------------------------------------------------------------------|
| <i>Preschool/childcare setting</i> |                                                                                |                                                 |                                                                       |                     |                                                                                                                                                                                                                                                                                              |                        |                                                                                                 |                                                                                                                                                                                                                                                            |
| Alhassan 2012 <sup>48</sup><br>USA | n=114 (low SES Hispanic and African-American)<br>49% boys<br>Mean age 4.5±0.6y | RCT<br>Preschool<br>6 months                    | 30 min/ day<br>PA sessions,<br>5 days/week                            | PA, FMS, SB         | Locomotor skill (LMS)-oriented lesson plans delivered by trained teachers                                                                                                                                                                                                                    | Unstructured free time | ActiGraph accel (15s epoch; Sirard cut point <sup>a</sup> , valid data: ≥9h/day, ≥4 weekdays)   | Significant difference for % sedentary time during preschool hours between IV and control groups, adjusted mean diff (95% CI): -9.6 (-17.5, -1.8), p=0.02                                                                                                  |
| Alhassan 2013 <sup>51</sup><br>USA | n=67<br>56.5% boys<br>Mean age 4.1±0.7y                                        | Group-randomised design<br>Preschool<br>4 weeks | 12 30-min<br>PA sessions<br>(3 days/ week for 4 weeks)                | PA & SB             | Structured outdoor playtime sessions; age-appropriate, moderate- to vigorous-intensity physical activities for making outdoor playtime more effective at increasing PA                                                                                                                       | Usual play             | ActiGraph accel (15s epoch; Sirard cut point <sup>a</sup> , valid data: ≥9h/day, ≥4 weekdays)   | Significant group by time interactions observed for total daily (F(1, 37) = 10.83, p=0.01) and during school (F(1, 37) = 10.25, p=0.01) & of time spent sedentary<br><br>No significant differences in after-school/ evening time spent sedentary (p=0.07) |
| Annesi 2013 <sup>52</sup><br>USA   | n=885<br>49% boys<br>Mean age 4.4±0.5y                                         | RCT<br>Preschool<br>9 months                    | Daily structured 30-min PA session (PA measured at 1, 5 and 9 months) | PA & SB             | Preschool PA lessons; both treatment and control teachers received initial training but treatment teachers received an additional 4h training and retained a binder of daily lesson plans (including gross motor skills and behavioural skill training, e.g., goal setting, self-monitoring) | Usual PA program       | ActiGraph accel (15s epoch; Pate cut point <sup>b</sup> , criteria for valid data not reported) | % of school day in sedentary time (based on a mean of accel data from months 1, 5, and 9):<br>IV: 59.8±9.7<br>control: 59.1±7.3 (p>0.05)                                                                                                                   |

| Author                                          | Sample                                       | Design, setting & duration                                         | Sessions                                        | Behaviours targeted | Intervention                                                                                                                                                                                                                                                                                                                                                       | Control                                       | SB measure                                                                                                                                                                                                                                                    | Results                                                                                                                                                                                                                                                                                                                                                                                                                  |
|-------------------------------------------------|----------------------------------------------|--------------------------------------------------------------------|-------------------------------------------------|---------------------|--------------------------------------------------------------------------------------------------------------------------------------------------------------------------------------------------------------------------------------------------------------------------------------------------------------------------------------------------------------------|-----------------------------------------------|---------------------------------------------------------------------------------------------------------------------------------------------------------------------------------------------------------------------------------------------------------------|--------------------------------------------------------------------------------------------------------------------------------------------------------------------------------------------------------------------------------------------------------------------------------------------------------------------------------------------------------------------------------------------------------------------------|
| Cardon 2009 <sup>59</sup><br><i>Belgium</i>     | n=583<br>52% boys<br>Mean age<br>5.3±0.4y    | RCT<br>Preschool<br>F/u conducted<br>4-6 weeks post-implementation | n/a                                             | PA & SB             | Preschools randomly assigned to one of the following conditions: 1) play equipment provided, 2) markings painted on the playground, 3) play equipment provided and markings painted, 4) control condition.                                                                                                                                                         | No changes to playground                      | ActiGraph accel (15s epoch, Sirard cut point <sup>a</sup> , no criteria for valid data required; monitors worn only during recess pre- and post-test)                                                                                                         | No significant IV effects for any of the groups; estimated effect of IV on % time spent sedentary:<br><br>Play equipment group: $\beta = 2.1$ (95% CI -3.1, 7.3)<br><br>Markings group: $\beta = -1.1$ (95% CI -6.3, 4.1)<br><br>Play equipment and markings group: $\beta = -1.7$ (95% CI -9.1, 5.6)                                                                                                                    |
| De Bock 2013 <sup>65</sup><br><i>Germany</i>    | n=826<br>52% boys<br>Mean age<br>5.0±0.2y    | RCT<br>Preschools<br>6-9 months                                    | n/a                                             | PA & SB             | Augmented state-sponsored PA program; parents motivated to develop and implement their own project ideas for promoting children's PA                                                                                                                                                                                                                               | Non-participatory, state-sponsored PA program | Actiheart accel (15s epoch, De Bock cut point <sup>c</sup> , valid data: $\geq 1$ weekday and $\geq 1$ weekend day)                                                                                                                                           | At 12 months, compared with control children, IV children spent 11 minutes less being sedentary per waking day (95% CI 5.39, 17.01, $p=0.019$ )                                                                                                                                                                                                                                                                          |
| De Craemer 2016 <sup>61</sup><br><i>Belgium</i> | n=859<br>54.4% boys<br>Mean age:<br>4.4±0.6y | RCT<br>Kindergarten<br>24 weeks                                    | Three 1-hour sessions for kindergarten teachers | Diet, PA & SB       | Kindergarten teachers received training and were given a guide which included suggestions of environmental changes in the classroom (e.g. computers on a raised desk), movement breaks, stories, and fun activities to decrease screen time. Parents received two newsletters and two tip cards containing different tips and strategies for reducing screen time. | Usual kindergarten program                    | Screen time: parent survey (hours spent watching TV and using a computer/video games during free time/leisure time)<br>ActiGraph accel (15s epoch, Evenson cut point <sup>d</sup> , valid data: $\geq 6$ h/day on $\geq 2$ weekdays and $\geq 1$ weekend day) | No overall intervention effect for either sedentary time or screen time on total sample (all $p>0.05$ ), but some effects on specific subgroups:<br><br>Significant intervention effects on sedentary time on weekdays ( $\beta = -4.20$ ; $p = 0.03$ ) and during school hours ( $\beta = -2.48$ ; $p = 0.04$ ) found for children from high SES kindergartens<br><br>Significant intervention effect on TV viewing for |

| Author                               | Sample                                            | Design, setting & duration                        | Sessions                                                | Behaviours targeted | Intervention                                                                                                                                                                                                                                                                                                               | Control                     | SB measure                                                                                                                        | Results                                                                                                                                                                                                                                                                                                                                                                                                                                                                                                               |
|--------------------------------------|---------------------------------------------------|---------------------------------------------------|---------------------------------------------------------|---------------------|----------------------------------------------------------------------------------------------------------------------------------------------------------------------------------------------------------------------------------------------------------------------------------------------------------------------------|-----------------------------|-----------------------------------------------------------------------------------------------------------------------------------|-----------------------------------------------------------------------------------------------------------------------------------------------------------------------------------------------------------------------------------------------------------------------------------------------------------------------------------------------------------------------------------------------------------------------------------------------------------------------------------------------------------------------|
|                                      |                                                   |                                                   |                                                         |                     |                                                                                                                                                                                                                                                                                                                            |                             |                                                                                                                                   | girls on weekend days ( $\beta = -9.98$ ; $p = 0.04$ )<br><br>Significant intervention effect on computer use on weekend days for children from low SES kindergartens ( $\beta = -6.43$ ; $p = 0.03$ )                                                                                                                                                                                                                                                                                                                |
| Dennison 2004 <sup>41</sup><br>USA   | n=77<br>50% boys<br>Age range 2.6-5.5y            | RCT<br>Preschool and day care centres<br>39 weeks | Seven 1-h sessions dedicated to TV                      | Diet & SB           | Program staff (an early childhood teacher and a music teacher) visited each day care or preschool centre in the intervention group once a week to provide a 1-hour session; half of each session was spent in musical activities; 10 mins eating a snack; and 20 mins participating in an interactive educational session. | Health and safety education | Screen time; parent survey (TV and computer/video game playing hours on Saturday and Sunday and average weekday in the past week) | Difference in mean changes (95% CI) between groups:<br><br>TV viewing:<br>Weekdays: $-0.62$ ( $-1.11$ to $-0.12$ ), $p=0.02$<br>Saturday: $-0.63$ ( $-1.44$ to $0.17$ ), $p=0.11$<br>Sunday: $-0.99$ ( $-1.73$ to $-0.25$ ), $p=0.01$<br><br>Children viewing $\geq 2$ h/day: $-21.5$ ( $-42.5$ to $-0.5$ )<br>$p=0.045$<br><br>Computer/video game use:<br>Weekdays: $-0.11$ ( $-0.34$ to $0.13$ ), $p=0.33$<br>Saturday: $-0.07$ ( $-0.49$ to $0.34$ ), $p=0.70$<br>Sunday: $-0.03$ ( $-0.27$ to $0.21$ ), $p=0.79$ |
| Fitzgibbon 2005 <sup>44</sup><br>USA | n=331 (>80% Latino)<br>50% boys<br>Age range 3-5y | RCT<br>Head Start sites<br>14 weeks               | Children: three 40-min sessions/week<br>Parents: weekly | Diet, PA & SB       | Child education on nutrition, physical activity, and decreasing sedentary behaviour; PA session. Parents received weekly newsletters and homework assignments.                                                                                                                                                             | General health concepts     | TV viewing; parent survey (average h/day watching TV)                                                                             | No significant differences in TV h/day between groups post-intervention (mean diff = diff: $-0.17$ [95% CI $-0.17$ , $0.30$ ]), at 1 year f/u (mean diff = $-0.17$ [95% CI $-0.75$ , $0.42$ ]) or at 2 year f/u (mean                                                                                                                                                                                                                                                                                                 |

| Author                               | Sample                                               | Design, setting & duration                               | Sessions                                                                  | Behaviours targeted | Intervention                                                                                                                                                                                           | Control                                                                             | SB measure                                                                                                                                                                                                                                                                        | Results                                                                                                                                                                                                                                       |
|--------------------------------------|------------------------------------------------------|----------------------------------------------------------|---------------------------------------------------------------------------|---------------------|--------------------------------------------------------------------------------------------------------------------------------------------------------------------------------------------------------|-------------------------------------------------------------------------------------|-----------------------------------------------------------------------------------------------------------------------------------------------------------------------------------------------------------------------------------------------------------------------------------|-----------------------------------------------------------------------------------------------------------------------------------------------------------------------------------------------------------------------------------------------|
|                                      |                                                      |                                                          | newsletters                                                               |                     |                                                                                                                                                                                                        |                                                                                     |                                                                                                                                                                                                                                                                                   | diff = -0.11 [95% CI -0.60, 0.38])                                                                                                                                                                                                            |
| Fitzgibbon 2006 <sup>45</sup><br>USA | n=300 (>90% black)<br>51% boys<br>Age range 3-5y     | RCT<br>Head Start sites<br>14 weeks                      | Children: three 40-min sessions/week<br>Parents: weekly newsletters       | Diet, PA & SB       | Child education on nutrition, physical activity, and decreasing sedentary behaviour; PA sessions (3/week). Parents received weekly newsletters and homework assignments.                               | General health concepts                                                             | TV viewing; parent survey (average h/day watching TV)                                                                                                                                                                                                                             | No significant differences in TV h/day between groups post-intervention (mean diff = 0.03 [95% CI -0.38, 0.44]) or at 2 year f/u (mean diff = 0.00 [95% CI - 0.38, 0.38])                                                                     |
| Fitzgibbon 2011 <sup>46</sup><br>USA | n=669 (majority black)<br>47% boys<br>Age range 3-5y | RCT<br>Head Start programs at public schools<br>14 weeks | Two to three 40-min sessions per week                                     | Diet, PA & SB       | Trained teachers delivered 2-3 weekly sessions related to healthy eating, increasing PA and decreasing SB. Parents received a weekly newsletter, homework assignments and a CD with teacher's lessons. | Health and safety                                                                   | Screen time; parent survey (time child spent watching TV/ videos/ DVDs, playing video games, or using a computer on an average weekday and average weekend day; mins/day TV and total screen time calculated using a weighted average of time spent on weekdays and weekend days) | Screen time mins/day was significantly lower for IV group than control group post-intervention (mean diff = -27.8 [95% CI -55.1, -0.5], p=0.05)<br><br>No significant difference for TV min/day (mean diff: -10.2 [95% CI -24.9, 4.6] p=0.16) |
| Fitzgibbon 2013 <sup>43</sup><br>USA | n=146 (Hispanic)<br>50% boys<br>Mean age 54.2±5.0mo  | RCT<br>Preschool<br>14 weeks                             | Children: three 40 min sessions per week.<br>Parents: six 90 min sessions | Diet, PA & SB       | Family-based intervention including child sessions on nutrition instruction and aerobic activity, and parent sessions on healthful eating and family exercise plus 30 mins of moderate PA.             | Children: once weekly general health intervention<br>Parents: weekly general health | ActiGraph accel (15s epoch; Pfeiffer cut point <sup>e</sup> ; valid data: ≥8h/day on ≥4 days);<br>Screen time;                                                                                                                                                                    | No significant differences between groups for % sedentary time ( $\beta = -0.27$ [95% CI -6.59, 6.05], total screen time ( $\beta = 0.26$ [05% CI -0.58, 1.10]) or TV viewing ( $\beta = 0.07$ [95% CI                                        |

| Author                                          | Sample                                                                | Design, setting & duration                    | Sessions                                           | Behaviours targeted | Intervention                                                                                                                                                                                                                                                                                                                                                                  | Control                                                                                                 | SB measure                                                                                                                                    | Results                                                                                                                                                                                           |
|-------------------------------------------------|-----------------------------------------------------------------------|-----------------------------------------------|----------------------------------------------------|---------------------|-------------------------------------------------------------------------------------------------------------------------------------------------------------------------------------------------------------------------------------------------------------------------------------------------------------------------------------------------------------------------------|---------------------------------------------------------------------------------------------------------|-----------------------------------------------------------------------------------------------------------------------------------------------|---------------------------------------------------------------------------------------------------------------------------------------------------------------------------------------------------|
|                                                 |                                                                       |                                               |                                                    |                     | Parents also received weekly newsletters to parallel the children's school-based component.                                                                                                                                                                                                                                                                                   | newsletters                                                                                             | parent survey (min/day watching TV, playing video games and using a computer on average weekday and average weekend day)                      | -0.41, 0.56] post-IV                                                                                                                                                                              |
| Jones 2015 <sup>58</sup><br><i>Australia</i>    | n=90<br>Sex split not reported<br>Age range 3-5y                      | RCT<br>Childcare centres<br>12 months         | Three 1-h workshops with centre staff              | Diet, PA and SB     | Development of written nutrition and physical activity policies; staff role modelling of physically active play; staff provision of prompts and positive comments to children to encourage PA; provision of adult-guided fundamental movement skill development activities every day for at least 75 % of children; restriction of sedentary screen time to less than weekly. | 3 newsletters (for centres) containing information on healthy eating and PA (unrelated to intervention) | Direct observation using System for Observing Play and Leisure in Youth (SOPLAY); 1-day (between 9am and 3pm) observation, in 10min intervals | No significant difference between proportion of children engaged in sedentary behaviour in IV group (44.8%, 95% CI 41.5, 48.1) and control group (49.2%, 95% CI 45.8, 52.5) at follow-up (p=0.49) |
| Lerner-Geva 2015 <sup>68</sup><br><i>Israel</i> | n=204<br>53.6% boys<br>IV; 54.4% boys group control<br>Age range 4-6y | RCT <sup>f</sup><br>Kindergartens<br>10 weeks | 10 nutrition lessons and 5 30-min PE lessons/ week | Diet, PA & SB       | Child education lessons covering nutrition topics and daily exercise program delivered by a trained teacher of physical education.                                                                                                                                                                                                                                            | Usual kindergarten program                                                                              | Screen time; parent survey (hours of TV viewing and computer use in a typical week)                                                           | No significant differences between IV and control groups screen time h/day (intervention effect estimate = -0.08 [95% CI -0.45, 0.28], p=0.65)                                                    |
| Natale 2014 <sup>40</sup><br><i>USA</i>         | n=307<br>51% boys<br>Age range 2-5y                                   | RCT<br>Preschool<br>6 months                  | Parents: six sessions                              | Diet, PA & SB       | Policy changes to improve nutrition, increase PA and decrease TV, and teacher training; monthly educational dinners, monthly newsletters and at-                                                                                                                                                                                                                              | Injury prevention education                                                                             | Screen time; parent survey (h/day child watched TV, watched or played video games, and                                                        | Over time children in control centres spent significantly more time on the computer (p<0.01) and watching TV (p<0.0001) than children in IV centres                                               |

| Author                                  | Sample                                      | Design, setting & duration                                             | Sessions         | Behaviours targeted | Intervention                                                                                                                                                                       | Control                                    | SB measure                                                                                                                                                                                                                                                                                 | Results                                                                                                                                                             |
|-----------------------------------------|---------------------------------------------|------------------------------------------------------------------------|------------------|---------------------|------------------------------------------------------------------------------------------------------------------------------------------------------------------------------------|--------------------------------------------|--------------------------------------------------------------------------------------------------------------------------------------------------------------------------------------------------------------------------------------------------------------------------------------------|---------------------------------------------------------------------------------------------------------------------------------------------------------------------|
|                                         |                                             |                                                                        |                  |                     | home activities focused on increased PA and fresh produce intake, decreased intake of simple carbohydrate snacks, and decreased screen time for parents.                           |                                            | used a computer during the past 30 days)                                                                                                                                                                                                                                                   |                                                                                                                                                                     |
| O'Dwyer 2012 <sup>63</sup><br><i>UK</i> | n=182<br>51.9% boys<br>Mean age<br>2.8±0.6y | RCT<br>Preschools<br>(attached to<br>SureStart<br>centres)<br>10 weeks | Five<br>sessions | PA & SB             | Educational workshops for parents, log book to self-monitor home activity, instructional and educational materials throughout intervention (including guidelines, manuals, games). | Usual<br>physical<br>activity<br>provision | ActiGraph accel (5s epoch; Sirard cut point <sup>a</sup> ; valid data: ≥521 and ≥483 mins/day on weekdays and weekend days, respectively, at baseline and ≥466 and ≥448 mins/day for weekdays and weekend days, respectively, at post-test, and ≥2 valid weekdays and 1 valid weekend day) | Significant intervention effect on both weekday ( $\beta = -8.76$ [95% CI -12.32, -5.2]) and weekend day ( $\beta = -23.11$ [95% CI -29.17, -17.06]) sedentary time |
| O'Dwyer 2013 <sup>62</sup><br><i>UK</i> | n=240<br>51.7% male<br>Mean age<br>4.5±0.6y | RCT<br>Preschool<br>(attached to<br>SureStart<br>centres)<br>6 weeks   | Six sessions     | PA & SB             | Preschool teachers participated in a 6-week active play programme. Comprehensive resource pack provided to each school with activity cards.                                        | Usual PA<br>provision                      | ActiGraph accel (5s epoch, Sirard cut point <sup>a</sup> ; valid data: ≥623min at baseline, ≥565min post-test [calculated by defining 80% of total length of time during which 70% of sample wore the accel)                                                                               | No significant intervention effect from baseline to post-test ( $\beta = 7.9$ [95% CI -1.5, 17.3])                                                                  |

| Author                                         | Sample                                        | Design, setting & duration           | Sessions                                                                                                                        | Behaviours targeted     | Intervention                                                                                                                                                                                                                                                                                                                                                                                                                      | Control             | SB measure                                                                                                                                                                                                                         | Results                                                                                                                                                                            |
|------------------------------------------------|-----------------------------------------------|--------------------------------------|---------------------------------------------------------------------------------------------------------------------------------|-------------------------|-----------------------------------------------------------------------------------------------------------------------------------------------------------------------------------------------------------------------------------------------------------------------------------------------------------------------------------------------------------------------------------------------------------------------------------|---------------------|------------------------------------------------------------------------------------------------------------------------------------------------------------------------------------------------------------------------------------|------------------------------------------------------------------------------------------------------------------------------------------------------------------------------------|
| Puder 2011 <sup>66</sup><br><i>Switzerland</i> | n=652<br>50% boys<br>Mean age<br>5.1±0.7y     | RCT<br>Preschool<br>1 year           | Children:<br>four PA<br>sessions/<br>week + 22<br>sessions on<br>nutrition,<br>media use<br>and sleep<br>parents: 3<br>sessions | Diet, PA, SB<br>& sleep | Lifestyle intervention<br>including PA program,<br>lessons on nutrition, media<br>use, sleep and adaption of<br>built environment of<br>preschool. Parents attended<br>3 interactive information<br>evenings.                                                                                                                                                                                                                     | Usual PA<br>program | Screen time;<br>parent survey (TV<br>viewing and<br>playing video/<br>computer games<br>mins/day)                                                                                                                                  | Significant difference<br>between screen time (TV,<br>video and computer use)<br>min/day for IV and control<br>groups, effect estimate (95%<br>CI): -13.4 (-25.0, -1.7),<br>p=0.03 |
| Verbestel 2013 <sup>60</sup><br><i>Belgium</i> | n=215<br>54% boys<br>Mean age<br>15.51±2.68mo | RCT<br>Day-care<br>centres<br>1 year | n/a                                                                                                                             | Diet, PA &<br>SB        | Family-based healthy<br>lifestyle intervention to<br>increase parental<br>knowledge, awareness, self-<br>efficacy, parental modelling<br>of the expected behaviours<br>and availability of the<br>healthy foods in the home<br>environment; parents<br>received guidelines and tips<br>presented on a poster and a<br>tailored feedback form for<br>parents about their<br>children's activity- and<br>dietary-related behaviours | Usual care          | Screen time;<br>parent survey<br>(usual time/day<br>child watches TV/<br>video/ DVDs on<br>weekdays and<br>weekend days;<br>categorised into<br>not at all,<br>0.5h/day, 1h/day,<br>2h/day, 3h/day,<br>4h/day, 5h/day,<br>≥6h/day) | No significant differences<br>between groups or within<br>groups from baseline to f/u<br>(time x condition estimate =<br>0.09, p>0.05)                                             |

| Author                             | Sample                                                                  | Design, setting & duration      | Sessions                                    | Behaviours targeted               | Intervention                                                                                                                                                                                                                                                           | Control                                                            | SB measure                                                                                                 | Results                                                                                                                                                                                                                                                                                                                      |
|------------------------------------|-------------------------------------------------------------------------|---------------------------------|---------------------------------------------|-----------------------------------|------------------------------------------------------------------------------------------------------------------------------------------------------------------------------------------------------------------------------------------------------------------------|--------------------------------------------------------------------|------------------------------------------------------------------------------------------------------------|------------------------------------------------------------------------------------------------------------------------------------------------------------------------------------------------------------------------------------------------------------------------------------------------------------------------------|
| <i>Home setting</i>                |                                                                         |                                 |                                             |                                   |                                                                                                                                                                                                                                                                        |                                                                    |                                                                                                            |                                                                                                                                                                                                                                                                                                                              |
| Evans 2011 <sup>42</sup><br>USA    | n=524<br>Sex-split not reported<br>Age range 3-7y                       | RCT<br>Home<br>1 year f/u       | One session only<br>(duration not reported) | Diet, PA & SB                     | In-home counselling session (and educational/promotional materials) on benefits of, and overcoming barriers to: eating fruits and veg, drinking water, eating low-fat dairy, limiting screen time, engaging in PA.                                                     | Usual care                                                         | Screen time; parent survey (average h/day watching TV, using video games and computer)                     | No significant effects of intervention observed (results not reported)                                                                                                                                                                                                                                                       |
| Haines 2013 <sup>39</sup><br>USA   | n=111<br>52.3% boys<br>Mean age 4.1±1.1y                                | RCT<br>Home<br>6 months         | Four home visits, four phone calls          | Diet, sleep, TV and TV in bedroom | Family-based intervention promoting limiting TV time and removing the TV from the child's bedroom, using motivational coaching at home and by phone, mailed educational materials, and text messages.                                                                  | Mailed packages (educational material on developmental milestones) | TV viewing; parent survey (h/day watching TV on average weekday and average weekend day in the last month) | No significant differences in TV h/day change between groups overall ( $\beta = -0.54$ [95% CI -1.22, 0.15] $p=0.12$ ) or on weekdays ( $\beta = -0.31$ [95% CI -0.98, 0.37], $p=0.37$ )<br><br>Significant difference in TV h/day change between groups on weekend days ( $\beta = -1.06$ [95% CI -1.97, -0.15], $p=0.02$ ) |
| Knowlton 2015 <sup>53</sup><br>USA | n=57<br>60.7% boys control group, 32.1% boys IV group<br>Age range 4-6y | RCT<br>Home (online)<br>4 weeks | Five online educational sessions            | Diet, PA & SB                     | Five educational sessions based designed to reify and improve five SCT constructs in mothers; one session dedicated to PA and one to screen time. Modalities included a 10- to 15-min audio-visual presentation, an interactive worksheet and a discussion board post. | Active control (knowledge-based program)                           | Screen time; parent survey (details of measure not reported)                                               | Overall decrease of 39.0 mins (95% CI -65.16, -12.84) of child screen time in both groups over the duration of the intervention, but no group-by-time interaction ( $p=0.37$ )                                                                                                                                               |



| Author                                     | Sample                                                | Design, setting & duration | Sessions          | Behaviours targeted                                                                              | Intervention                                                                                                                                                                                                                                                                              | Control                                            | SB measure                                                                                                                                                                                                                                                                                                                     | Results                                                                                                                                        |
|--------------------------------------------|-------------------------------------------------------|----------------------------|-------------------|--------------------------------------------------------------------------------------------------|-------------------------------------------------------------------------------------------------------------------------------------------------------------------------------------------------------------------------------------------------------------------------------------------|----------------------------------------------------|--------------------------------------------------------------------------------------------------------------------------------------------------------------------------------------------------------------------------------------------------------------------------------------------------------------------------------|------------------------------------------------------------------------------------------------------------------------------------------------|
| Ostbye 2012 <sup>49</sup><br><i>USA</i>    | n=400<br>56% boys<br>Mean age<br>3.06±1.0y            | RCT<br>Home<br>8 months    | Eight<br>sessions | Diet, PA &<br>SB                                                                                 | Mailed interactive kits including child activities and incentives reinforcing the month's topic (e.g., a rewards chart, yoga mat, pedometer, portion plate), followed each month by a 20–30 minute telephone coaching session using motivational interviewing techniques                  | Monthly newsletters emphasizing pre-reading skills | Actical accel (15s epoch; Evenson cut point <sup>d</sup> ; valid data: ≥6h/day on ≥2 weekdays and ≥1 weekend day)<br>TV viewing;<br>parent survey (time child spends watching TV/ videos/ DVDs on a usual weekday and usual weekend day [scale ranging from 0 to ≥6h, in 30-min segments]; used to calculate average mins/day) | No significant differences between IV and control groups from baseline to post-IV (p=0.23)                                                     |
| Wen 2012 <sup>70</sup><br><i>Australia</i> | n=667<br>Sex split not reported<br>Age at f/u<br>24mo | RCT<br>Home<br>~24 months  | Eight<br>sessions | Infant feeding practices, child nutrition & active play, family PA & nutrition, & social support | Mothers received eight one- two hour home visits from a trained nurse who taught specific skills and knowledge in relation to healthy infant feeding practices and active play and discussed any issues and concerns; mothers also received written resources to support each key message | Usual care and home safety promotion               | TV viewing;<br>parent survey (total time child spent watching TV each day in a usual week)                                                                                                                                                                                                                                     | IV group had a significantly lower percentage of children watching TV for >60 minutes a day than the control group (14% v 22%, p=0.02) post-IV |

| Author                                     | Sample                                                                                                          | Design, setting & duration                 | Sessions                         | Behaviours targeted | Intervention                                                                                                                                                                                                                                                                                                                                                                                                                                                                         | Control                                      | SB measure                                                                                                        | Results                                                                                                                                                        |
|--------------------------------------------|-----------------------------------------------------------------------------------------------------------------|--------------------------------------------|----------------------------------|---------------------|--------------------------------------------------------------------------------------------------------------------------------------------------------------------------------------------------------------------------------------------------------------------------------------------------------------------------------------------------------------------------------------------------------------------------------------------------------------------------------------|----------------------------------------------|-------------------------------------------------------------------------------------------------------------------|----------------------------------------------------------------------------------------------------------------------------------------------------------------|
| Yilmaz 2015 <sup>69</sup><br><i>Turkey</i> | n=412<br>64.8% boys<br>control;<br>66.3% boys<br>IV<br>Mean age<br>control:<br>3.49±1.22y,<br>IV:<br>3.52±1.28y | RCT<br>Home<br>6 weeks                     | One<br>counselling<br>phone call | SB                  | Parents received: printed materials and CDs with information about decreasing screen time at home, including information on harmful effects of screen time and alternative activities; a picture book depicting a family making their home screen-free; stories of families that were able to decrease screen time; one counselling call to encourage families to make their home screen-free, providing information on benefits of a screen-free home and difficulties in doing so. | Usual care                                   | Screen time; parent survey (TV/video watching and computer/video game playing for 1 week)                         | IV group spent significantly less mins/day in screen time (mean = 39.48, SD = 16.36) compared to control group (mean = 86.64, SD = 21.63), t = 23.5, P < 0.001 |
| Zimmerman 2012 <sup>50</sup><br><i>USA</i> | n=67;<br>(exposed to<br>>90 min TV<br>on average<br>day)<br>Sex split not<br>reported<br>Age range<br>2.5-4.5y  | RCT<br>Home<br>4 months                    | n/a                              | SB                  | In-person conferences, monthly newsletters, and e-mail contact to motivate behaviour change around child TV viewing                                                                                                                                                                                                                                                                                                                                                                  | Injury prevention and child safety education | TV viewing; 24-h time diary (on one randomly chosen weekday and one randomly chosen weekend day; 15-min segments) | Effect of IV significantly reduced TV viewing in IV group compared to control group by 37 mins/day (95% CI 5.6, 68.37)                                         |
| <b>Primary care setting</b>                |                                                                                                                 |                                            |                                  |                     |                                                                                                                                                                                                                                                                                                                                                                                                                                                                                      |                                              |                                                                                                                   |                                                                                                                                                                |
| Birken 2012 <sup>64</sup><br><i>Canada</i> | n=132<br>47% boys<br>Mean age<br>3.1±0.2y                                                                       | RCT<br>Paediatric<br>offices<br>1 year f/u | One 10-min<br>session            | SB                  | 10-min behavioural counselling intervention on health impacts of screen time and strategies to decrease screen time                                                                                                                                                                                                                                                                                                                                                                  | Usual care                                   | Screen time; parent survey (total time in mins child was in a room with TV/ video/ DVD on or playing video)       | No significant differences between groups from baseline to f/u. Adjusted mean (95% CI) between group diff: Weekday: -7 (-38, 23), p=0.65                       |

| Author                                               | Sample                                                | Design, setting & duration                     | Sessions                                    | Behaviours targeted        | Intervention                                                                                                                                                                                                                      | Control                    | SB measure                                                                                                                                                        | Results                                                                                                                                                                                                                      |
|------------------------------------------------------|-------------------------------------------------------|------------------------------------------------|---------------------------------------------|----------------------------|-----------------------------------------------------------------------------------------------------------------------------------------------------------------------------------------------------------------------------------|----------------------------|-------------------------------------------------------------------------------------------------------------------------------------------------------------------|------------------------------------------------------------------------------------------------------------------------------------------------------------------------------------------------------------------------------|
|                                                      |                                                       |                                                |                                             |                            |                                                                                                                                                                                                                                   |                            | games or using the Internet during the previous weekday and previous weekend day)                                                                                 | Weekend day: 2 (-16, 20), p=0.80                                                                                                                                                                                             |
| Taveras 2011 <sup>47</sup><br><i>USA</i>             | n=475<br>52% boys<br>Mean age 4.9±1.2y                | RCT<br>Paediatric offices<br>1 year            | Four in person visits and three phone calls | Diet, TV in bedroom and TV | Intervention practices received primary care restructuring, and families received motivational interviewing by clinicians and educational modules targeting television viewing and fast food and sugar-sweetened beverage intake. | Usual care                 | TV viewing; parent survey (total TV and video viewing h/day)                                                                                                      | TV mean h/day (SD) decreased significantly for IV group compared to control group; $\beta$ =-0.36 (-0.64, -0.09), p=0.01                                                                                                     |
| van Grieken 2014 <sup>67</sup><br><i>Netherlands</i> | n=298 (overweight)<br>38.1% boys<br>Mean age 5.8±0.4y | RCT<br>Youth health care centres<br>2 year f/u | One session                                 | diet, outside play & TV    | Lifestyle counselling to parent at 5 year check-up: motivational interviewing to promote development of a healthy weight incl. limiting television time to a maximum of 2 h a day                                                 | Usual care                 | TV viewing; parent survey (time spent in front of the screen [including DVD viewing] in hours and mins on both a weekday and weekend day; TV mins/day calculated) | Proportion of children watching $\leq$ 2h/day TV decreased for both groups (IV group from 74.8% to 66.0%, control group from 75.2% to 69.0%; both p>0.05)<br><br>OR (95% CI) for difference between groups 0.93 (0.53, 1.61) |
| <b>Community-based setting</b>                       |                                                       |                                                |                                             |                            |                                                                                                                                                                                                                                   |                            |                                                                                                                                                                   |                                                                                                                                                                                                                              |
| Campbell 2013 <sup>54</sup><br><i>Australia</i>      | n=542<br>53% boys<br>Mean age 3.8mo                   | RCT<br>First-time parent groups<br>15 months   | Six 2-hour sessions                         | Diet, PA & SB              | Parents offered six 2-hour dietitian-delivered sessions over 15 months focusing on parental knowledge, skills, and social support around infant feeding, diet, physical activity, and television viewing                          | Usual care from MCH nurses | TV viewing; parent survey (mins spent watching TV on a typical day)                                                                                               | No significant differences in TV min/day mid-intervention (child age 9mo): mean diff = -1.64 (95% CI -10.70, 7.43), p=0.72<br><br>IV children watched                                                                        |

| Author                                           | Sample                                                                         | Design, setting & duration                                 | Sessions            | Behaviours targeted | Intervention                                                                                                                                                                                                                                                                                                                                                                            | Control           | SB measure                                                                                                                                                                                                                                                    | Results                                                                                                                                                                                                                                                                                              |
|--------------------------------------------------|--------------------------------------------------------------------------------|------------------------------------------------------------|---------------------|---------------------|-----------------------------------------------------------------------------------------------------------------------------------------------------------------------------------------------------------------------------------------------------------------------------------------------------------------------------------------------------------------------------------------|-------------------|---------------------------------------------------------------------------------------------------------------------------------------------------------------------------------------------------------------------------------------------------------------|------------------------------------------------------------------------------------------------------------------------------------------------------------------------------------------------------------------------------------------------------------------------------------------------------|
|                                                  |                                                                                |                                                            |                     |                     |                                                                                                                                                                                                                                                                                                                                                                                         |                   |                                                                                                                                                                                                                                                               | significantly less TV min/day than control children post-IV: mean diff = -17.12 (95% CI -26.45, -7.79), p<0.001                                                                                                                                                                                      |
| Hinkley 2015 <sup>55</sup><br><i>Australia</i>   | n=22<br>60% boys control group,<br>67% boys IV group<br>Age range 2-3y         | RCT<br>Sessions held at University<br>6 weeks              | Six 1-h sessions    | SB                  | Anticipatory guidance perspective to facilitate group-based problem solving to possible challenges, to increase knowledge about screen time recommendations and outcomes of screen time, increase awareness and implementation of strategies to participate in healthy levels of screen time, and teach families how to practice behaviour modification such as planning and monitoring | Wait-list control | activPAL accel (15s epoch; valid data: ≥6h/day on ≥3 weekdays and ≥1 weekend day)<br>Screen time; parent time-use diary on 3 weekdays and 1 weekend day (amount of time spent watching TV, using computer, e-games and handheld devices in 15-min increments) | No significant difference between groups on % time sitting from activPALs (adjusted group mean diff = 1.0 (95% CI -7.7, 9.7), effect size = 0.11)<br><br>No significant difference between groups on mins/day total screen time (adjusted mean diff = -31.2 (95% CI -71.0, 8.6), effect size = 0.70) |
| Skouteris 2015 <sup>57</sup><br><i>Australia</i> | n=201<br>52.6% boys control group;<br>47.3% boys IV group<br>Mean age 2.7±0.6y | RCT<br>Community venues or participants' homes<br>10 weeks | 10 90-min workshops | Diet, PA & SB       | Workshops relating to nutrition, PA, parenting and lifestyle behaviours. Each workshop included 3 sections: (i) 30 min of guided active play; (ii) 15 min of healthy snack time based on an evidence-based, exposure technique to promote acceptance of fruit and vegetables and (iii) 45 min of supervised creative play activities for the children while parents                     | Wait-list control | Screen time and SB; parent report using Physical Activity Questionnaire for pre-school-aged children (Pre-PAQ) (time child spent in activities 'yesterday' [weekday] and 'last weekend' [Saturday and Sunday]; 3-day                                          | No significant intervention effect on either screen time (-10.26 [95% CI -26.26, 5.74], p=0.21) or SB (15.33 [95% CI -20.02, 50.68], p=0.40)                                                                                                                                                         |

| Author | Sample | Design, setting & duration | Sessions | Behaviours targeted | Intervention                                                     | Control | SB measure                                                                              | Results |
|--------|--------|----------------------------|----------|---------------------|------------------------------------------------------------------|---------|-----------------------------------------------------------------------------------------|---------|
|        |        |                            |          |                     | attended an interactive education and skill development session. |         | mean calculated for both screen time and SB (average of 1 weekday, Saturday and Sunday) |         |

Notes: <sup>a</sup> Sirard sedentary cut points: 3y  $\leq$ 301 counts/15s, 4y  $\leq$ 363 counts/15s, 5y  $\leq$ 398 counts/15s; <sup>b</sup> Pate sedentary cut point: <200 counts/15s; <sup>c</sup> De Bock sedentary cut points: boys <46 counts/15s, girls <26 counts/15s; <sup>d</sup> Evenson sedentary cut point:  $\leq$ 15 counts/15s; <sup>e</sup> Pfeiffer sedentary cut point: <38 counts/15s; <sup>f</sup> three-armed RCT (full IV, partial IV, control) but only results from full IV and control groups used for this study as partial IV group received only nutritional content

Abbreviations: 95% CI; 95% Confidence Interval; accel. = accelerometer; BMI = body mass index; diff = difference; FMS = fundamental movement skills; f/u = follow up; h = hour; IV = intervention; LMS = locomotor skills; min = minute; PA = physical activity; RCT = randomised controlled trial; SB = sedentary behaviour; SCT = social cognitive theory; SES = socioeconomic status; TV = television; y = year.
